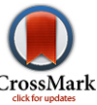

## Correction

# Correction: Isolation and Identification of *Oedogonium* Species and Strains for Biomass Applications

The *PLOS ONE* Staff

## Notice of Republication

This article was republished on April 17, 2014, to correct the figure order. Please download the article again to view the correct version. The originally published, uncorrected article and the republished, corrected article are provided here for reference.

## Supporting Information

**File S1.** Originally published, uncorrected article.  
(PDF)

**File S2.** Republished, corrected article.  
(PDF)

## Reference

1. Lawton RJ, de Nys R, Skinner S, Paul NA (2014) Isolation and Identification of *Oedogonium* Species and Strains for Biomass Applications. *PLoS ONE* 9(3): e90223. doi:10.1371/journal.pone.0090223

---

**Citation:** The *PLOS ONE* Staff (2014) Correction: Isolation and Identification of *Oedogonium* Species and Strains for Biomass Applications. *PLoS ONE* 9(5): e97373. doi:10.1371/journal.pone.0097373

**Published** May 5, 2014

**Copyright:** © 2014 The *PLOS ONE* Staff. This is an open-access article distributed under the terms of the Creative Commons Attribution License, which permits unrestricted use, distribution, and reproduction in any medium, provided the original author and source are credited.
